# Supplementary material for: LncRNA-KCNQ1OT1 Promotes the Odontoblastic Differentiation of Dental Pulp Stem Cells via Regulating miR-153-3p/RUNX2 Axis
Source: Research Square preprint supplement (doi:10.21203/rs.3.rs-942120/v2), 2022-01-03
Supplement: Supplementary file 1 [file fb9f0ffebddcfbbad6d4e8d6.xlsx]

## Sheet: result4
1	0.99	1.05	0.95	1.04
1	1.06	0.87	0.93	0.85
1	0.87	1.06	0.99	1.13
1	0.97	0.85	1.18	1.05
1	0.78	1.19	0.85	0.97
1	1.05	0.97	0.92	1.06
2	0.53	0.9	0.49	0.91
2	0.49	0.92	0.64	0.96
2	0.64	0.92	0.62	0.94
2	0.59	1.14	0.65	1.07
2	0.58	1	0.51	1.01
2	0.66	0.71	0.59	0.9
1=mimic	WT-lncRNA-KCNQ1OT1	MU-lncRNA-KCNQ1OT1	WT-RUNX2	MU-RUNX2
2=NC

## Sheet: result3
1	0.97	1.15	0.99	0.88	0.89	0.95	1.09	1.01
1	1	1.02	0.96	0.92	0.79	0.92	1.07	1
1	0.8	0.96	0.94	1	0.87	0.73	0.96	0.99
1	1.05	0.89	1.03	1.19	1.05	1.04	1.06	1
1	1.12	1.07	0.99	0.86	0.94	1.12	0.86	1.03
1	1.07	0.96	1.09	0.94	0.93	0.93	1.07	1.18
2	2.15	0.63	1.04	1.6	2.39	1.94	1.19	1.08
2	1.77	0.82	0.85	1.73	2.83	1.69	1.32	1.4
2	1.97	0.66	1.02	2.09	2.35	1.74	1.3	1.12
2	1.63	0.76	0.71	1.75	2.6	2.11	1.66	1.17
2	1.77	0.72	0.94	2.02	2.22	1.99	1.27	1.67
2	2.02	0.66	0.95	2.24	3.14	2.01	1.45	1.38
3	2.09	1.15	1.1	0.95	0.96	0.96	0.93	1.09
3	1.68	1.08	0.84	1.08	0.95	1.05	1.13	1.11
3	1.65	1.11	0.9	1.14	0.91	0.96	1.05	1.07
3	2.23	1.03	0.91	1.16	0.89	1.05	1.1	0.93
3	2.1	0.76	1.02	0.96	0.85	0.87	1.15	0.83
3	1.67	0.84	0.85	0.9	0.91	1.13	0.96	1.02
4	1.89	0.81	0.78	1.75	2.16	2.25	1.47	1.45
4	1.66	0.65	0.99	1.77	2.59	1.64	1.32	1.45
4	1.52	0.72	0.88	1.88	2.25	2.06	1.17	1.74
4	1.66	0.64	0.93	1.84	2.68	1.99	1.19	1.25
4	2.14	0.7	1.15	1.63	2.91	2.07	1.39	1.49
4	2.02	0.63	0.91	1.78	2.42	1.97	1.26	1.52
1=control	KCNQ1OT1	miR-153-3p	CCK-8	ALP	Alizarin red staining	RUNX2	DSPP	DMP-1
2=pcDNA-KCNQ1OT1
3=pcDNA-KCNQ1OT1+mimic
4=pcDNA-KCNQ1OT1+mimic NC

## Sheet: result2
1	1.06	0.82	0.93	0.98	1.15	1	0.94
1	0.79	1.04	0.88	0.89	1.08	0.9	0.88
1	1.06	0.94	0.85	1.12	1.02	0.87	1.01
1	1.02	1.18	1.12	0.94	1.19	0.95	1.08
1	0.99	1.06	0.93	1.02	1.11	1.03	0.98
1	0.91	1.03	0.99	1.06	0.98	0.82	0.99
1	0.95	0.94	0.93	1.04	0.88	1.1	1.01
1	0.94	0.95	1.17	0.99	1.01	1.08	0.77
2	1.08	1.07	1.01	1.09	1.08	0.9	1.08
2	0.85	0.95	0.95	1.04	0.94	1.09	1.07
2	1.18	1.04	0.89	1.1	1.22	0.83	0.88
2	0.98	1.04	0.88	0.99	0.86	0.95	1.03
2	0.82	1	0.83	1.01	1.02	0.99	1.02
2	1.07	0.97	0.88	1.11	0.93	0.94	0.97
2	1	0.96	0.88	1.06	1.08	1.1	1.08
2	0.81	1.16	1.05	0.92	0.96	0.93	1.22
3	1.02	1.06	0.92	0.87	0.9	0.95	1.03
3	1.06	0.79	0.88	0.94	1.2	1.1	1.06
3	0.92	1.05	0.83	0.93	1.07	0.78	0.96
3	0.88	1	0.9	0.91	0.92	0.97	1.08
3	0.98	1.02	1.03	1.11	1.12	0.93	1.04
3	0.88	1.04	0.99	1.15	1.01	1.1	1.19
3	0.95	1	0.95	1.04	1.04	0.77	1.05
3	0.87	0.9	0.98	0.82	1.01	0.88	0.95
4	1.9	1.06	2.08	2.37	1.65	1.47	1.09
4	1.94	1.06	1.81	2.47	1.52	1.49	1.16
4	1.49	0.89	1.74	2.7	1.61	1.37	1.41
4	2.14	1.03	1.34	2.04	1.82	1.61	1.29
4	1.94	1.16	2.18	2.19	2.08	1.42	1.43
4	1.9	1.1	1.84	2.11	1.78	1.35	1.43
4	1.92	1.06	1.69	2.45	1.31	1.17	1.61
4	1.63	0.97	1.94	2.96	2.04	1.59	1.26
5	0.45	1.16	0.65	0.54	0.26	0.57	0.45
5	0.46	0.95	0.55	0.6	0.31	0.51	0.52
5	0.44	1.02	0.41	0.49	0.34	0.53	0.55
5	0.45	1.12	0.65	0.61	0.36	0.47	0.53
5	0.43	1.05	0.66	0.59	0.31	0.54	0.43
5	0.36	1.06	0.63	0.51	0.29	0.47	0.51
5	0.41	1.15	0.57	0.59	0.22	0.54	0.55
5	0.5	1.18	0.65	0.56	0.28	0.46	0.58
1=control	KCNQ1OT1	CCK-8	ALP	Alizarin red staining	RUNX2	DSPP	DMP-1
2=pcDNA
3=siRNA NC
4=pcDNA-KCNQ1OT1
5=KCNQ1OT1 siRNA

## Sheet: result1
1	1.09	0.96	1.04
1	1.04	1.16	0.94
1	0.94	1.02	1.01
1	0.97	1.13	0.91
1	0.9	1.03	1.09
1	1.11	1.21	0.99
1	0.89	1.13	1.02
1	1.25	1.04	1.02
2	1.3	0.84	1.49
2	1.21	0.73	1.34
2	1.1	0.69	1.47
2	1.44	0.82	1.38
2	1.11	0.72	1.27
2	1.3	0.76	1.18
2	1.29	0.72	1.43
2	1.22	0.75	1.43
3	1.36	0.43	2.09
3	1.53	0.44	1.53
3	1.56	0.55	2.1
3	1.42	0.42	2.07
3	1.75	0.47	1.82
3	1.54	0.53	2.25
3	1.53	0.42	2.01
3	1.62	0.44	2.01
4	1.94	0.49	1.72
4	1.47	0.49	1.85
4	1.66	0.42	2.14
4	1.48	0.45	1.77
4	1.48	0.59	1.96
4	1.58	0.48	1.9
4	1.21	0.49	2.06
4	1.45	0.53	1.97
5	1.3	0.46	1.8
5	1.7	0.47	1.64
5	1.71	0.46	1.6
5	1.5	0.51	1.75
5	1.54	0.44	2.15
5	1.37	0.49	1.99
5	1.59	0.49	2.18
5	1.58	0.56	2.14
1=0d	KCNQ1OT1	miR-153-3p	RUNX2
2=1d
3=3d
4=7d
5=14d
